# Supplementary material for: Two robust Zn(ii)-organic frameworks as dual-functional fluorescent probes for efficient sensing of enrofloxacin and MnO4− anions
Source: Royal Society of Chemistry journal article supplement (doi:10.1039/d1ce01447a), 2021-11-17
Supplement: d1ce01447a1.pdf [file d1ce01447a1.pdf]

Supporting Information for CrystEngComm 2021

Two robust Zn(II)-organic frameworks as dual-functional fluorescent  
probes for efficient sensing of enrofloxacin and  $\text{MnO}_4^-$  anions

Yu-Qiao Su<sup>a</sup>, Ruo-Tong Wang<sup>a</sup>, Olga A. Blatova<sup>b</sup>, Yong-Sheng Shi<sup>a</sup>,

Guang-Hua Cui<sup>a\*</sup>

<sup>a</sup>*College of Chemical Engineering, Hebei Key Laboratory for Environment Photocatalytic and  
Electrocatalytic Materials, North China University of Science and Technology, No. 21 Bohai*

*Road, Caofeidian new-city, Tangshan, Hebei, 063210, P. R. China*

<sup>b</sup>*Samara Center for Theoretical Materials Science (SCTMS), Samara State Technical University,*

*Molodogvardeyskaya St. 244, 443100 Samara, Russian Federation.*

Corresponding author: Guang-Hua Cui

Fax: +86-315-8805462. Tel: +86-315-8805460.

E-mail: tscghua@126.com

## **CONTENTS**

**Section 1. Experimental Section**

**Section 2. Supplementary Tables**

**Section 3. Supplementary Figures**

## **Section 1. Computational Details**

1. Materials and methods
2. Single-crystal X-ray structure determination of **1–2**
3. Computational details

## 1. Materials and methods

L1–L2 were collected from Jinan Henghua Sci. & Tec. Co. Ltd. (Jinan, China). The others chemicals and reagents were purchased and could be used without further purification. On a Rigaku D/Max-2500 X-ray powder diffractometer (Cu-K $\alpha$ , 1.5418 Å), powder X-ray diffraction (PXRD) patterns were carried out. In the 4000 to 400 cm<sup>-1</sup> area, the FT-IR spectra were recorded from a Bruker VERTEX 80V FT-IR spectrophotometer. Elemental tests (C, H, and N) were conducted on the elemental analyzer PerkinElmer 240 C. A NETZSCH TG 209 thermal analyzer in air was used to collect thermogravimetric analysis (TGA) data at a heating rate of 10 °C min<sup>-1</sup> in the 25–700 °C range. Ultrasonic irradiation was carried out in an ultrasonic bath KQ-300DE (40 kHz, Sonicator Company, Kunshan, China). The solid-state fluorescent assay was performed using an Edinburgh FS5 fluorescence spectrophotometer at room temperature.

## 2. Single crystal X-ray diffraction determination of 1–2

The single-crystal structure data of 1–2 were obtained at room temperature on a Rigaku XtaLabMini diffractometer fitted with Mo-K $\alpha$  radiation ( $\lambda$  = 0.71073 Å), using the CrysAlisPro software to record the reflection data.<sup>1</sup> Structural analysis and data refinement were performed through the SHELXT-2015 and SHELXL-2018 programs.<sup>2–4</sup> From differential Fourier charts, all ordered non-hydrogen atoms were found and refined with anisotropic thermal parameters. The H atoms of organic ligands are technically produced and isotropically refined with fixed thermal factors. The H atoms in water molecules were added by difference Fourier maps and with fixed displacement parameters.<sup>5</sup> **Table S1** summarizes crystallographic details and structure refinement parameters for 1–2. Selected bond lengths and bond angles are shown in **Table S2**.

## 3. Computational Details

All calculations on electronic structures were carried out *via* ORCA 2.8 program.<sup>6</sup> Geometry optimizations was calculated through density functional theory (DFT). The frontier orbital energy of Zn(II) ions, free L1 and L2, and H<sub>2</sub>NDC were calculated by B3LYP/TZVP.<sup>7–9</sup> Molecular orbital visualization was analyzed by VMD 1.9.3 program.<sup>10</sup> The structural properties of the two Zn(II)-MOFs were calculated by Poreblazer v4.0 program (**Table S4**).<sup>11</sup>

## References

- [1] Agilent. CrysAlis PRO. Agilent Technologies Ltd, Yarnton, Oxfordshire, England, 2014.
- [2] O. V. Dolomanov, L. J. Bourhis, R. J. Gildea, J. A. K. Howard, J.A.K., H. Puschmann, *J. Appl. Cryst.* 2020, **42**, 339–341.
- [3] L. J. Bourhis, O. V. Dolomanov, R. J. Gildea, J. A. K. Howard, H. Puschmann, *Acta Cryst.* 2020, **A71**, 59–75.
- [4] G. M. Sheldrick, *Acta Crystallogr., Sect. C: Cryst. Struct. Commun.*, 2015, **71**, 3–8.
- [5] A. L. Spek, *Acta Crystallogr., Sect. D*, 2009, **65**, 148–155.
- [6] F. Neese, *Wiley Interdiscip. Rev. Sci.*, 2012, **2**, 73–78.
- [7] A. D. Becke, *J. Chem. Phys.*, 1993, 5648.
- [8] A. D. Becke, *Phys. Rev.*, 1988, **38**, 3098.
- [9] O. Treutler, R. Ahlrichs, *J. Chem. Phys.*, 1995, **102**, 346–354.
- [10] W. Humphrey, A. Dalke, K. Schulten, *J. Mol. Graphics*, 1996, **14**, 33–38.
- [11] L. Sarkisov, R. B. Perez, M. Sutharson, D. F. Jimenez, *Chem. Mater*, 2020, **32**, 9849–9867.

## Section 2. Supplementary Schemes and Tables

Scheme Titles:

**Scheme S1** Structure formulas of L1–L2 ligands.

**Scheme S2** The structure formulas of different types of antibiotics.

Table Titles:

**Table S1** Crystal data and structure refinements for the **1–2**.

**Table S2** Selected Bond Lengths [ $\text{\AA}$ ] and Angles [ $^\circ$ ] for the **1–2**.

**Table S3** Thermal stability analysis for **1–2**.

**Table S4.** Comparison of the sensitivities of **1–2** with previously reported MOFs to enrofloxacin.

**Table S5.** Comparison of the sensitivities of **1–2** with previously reported MOFs to  $\text{MnO}_4^-$ .

**Table S6** The structural properties for **1** and **2**.

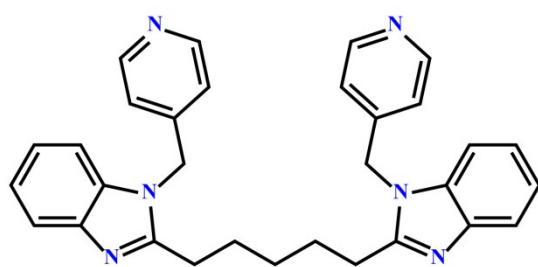

**L1**

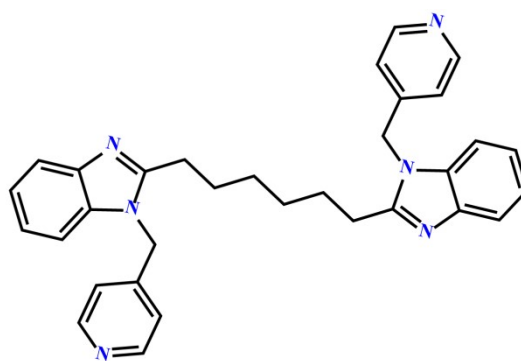

**L2**

**Scheme S1** Structure formulas of L1–L2 ligands.

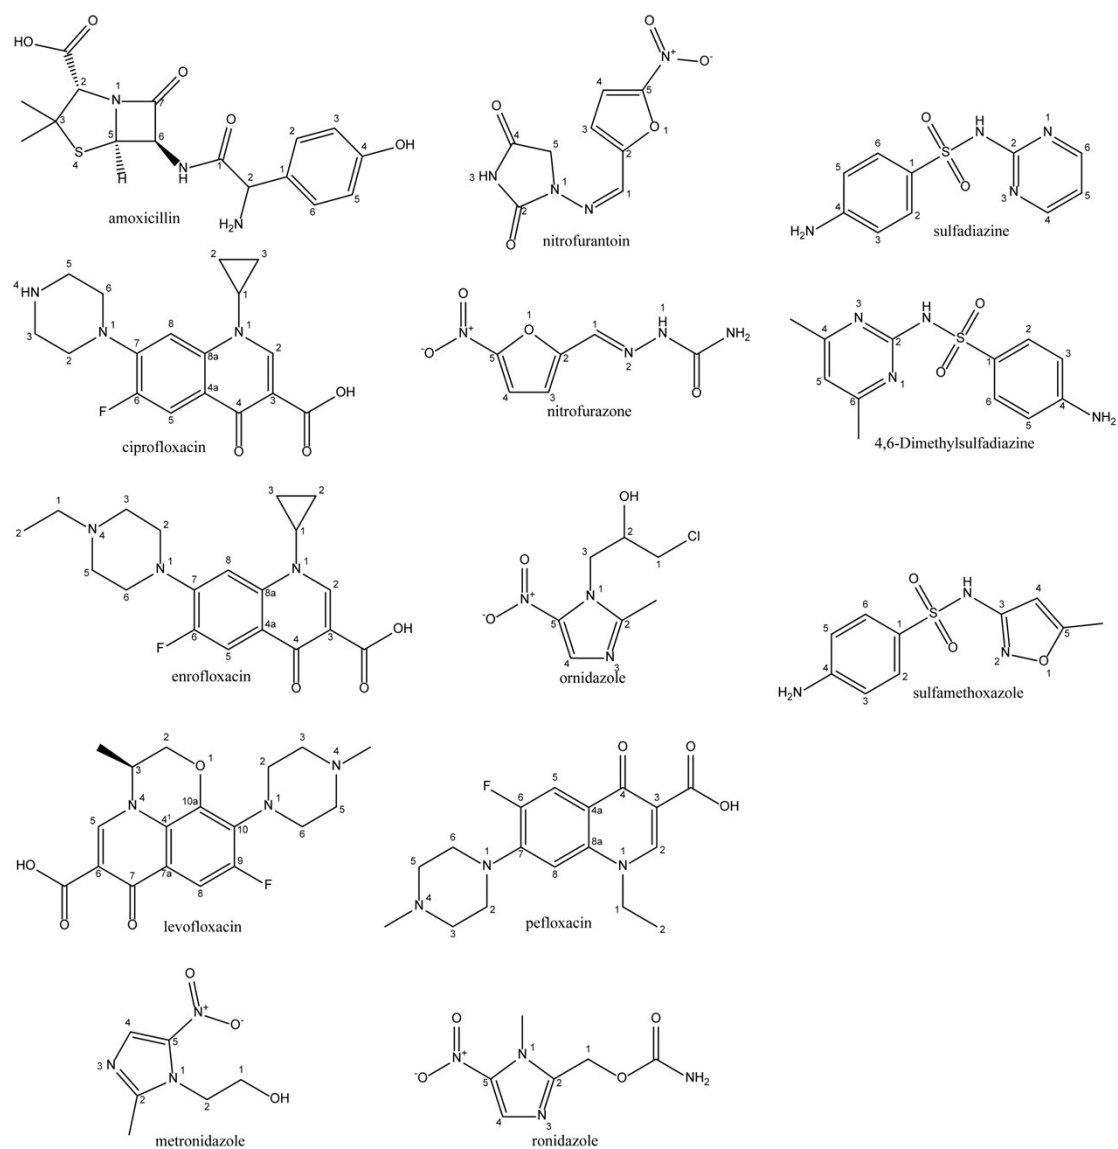

**Scheme S2** The structure formulas of different types of antibiotics.



**Table S1** Crystal data and structure refinements for the **1–2**

| MOF                                                                               | <b>1</b>                                                                           | <b>2</b>                                                         |
|-----------------------------------------------------------------------------------|------------------------------------------------------------------------------------|------------------------------------------------------------------|
| Chemical formula                                                                  | C <sub>123</sub> H <sub>93</sub> N <sub>12</sub> O <sub>22.5</sub> Zn <sub>6</sub> | C <sub>44</sub> H <sub>42</sub> N <sub>6</sub> O <sub>6</sub> Zn |
| Formula weight                                                                    | 2491.44                                                                            | 816.20                                                           |
| Crystal system                                                                    | triclinic                                                                          | monoclinic                                                       |
| Space group                                                                       | <i>P</i> $\bar{1}$                                                                 | <i>P</i> 2 <sub>1</sub> /c                                       |
| <i>a</i> (Å)                                                                      | 10.8732(6)                                                                         | 17.8383(5)                                                       |
| <i>b</i> (Å)                                                                      | 15.9024(9)                                                                         | 14.9191(3)                                                       |
| <i>c</i> (Å)                                                                      | 17.0471(7)                                                                         | 16.6035(5)                                                       |
| $\alpha$ (°)                                                                      | 105.733(4)                                                                         | 90                                                               |
| $\beta$ (°)                                                                       | 103.099(4)                                                                         | 108.071(3)                                                       |
| $\gamma$ (°)                                                                      | 91.265(4)                                                                          | 90                                                               |
| <i>V</i> (Å <sup>3</sup> )                                                        | 2751.8(3)                                                                          | 3974.2(2)                                                        |
| <i>Z</i>                                                                          | 1                                                                                  | 4                                                                |
| <i>D</i> <sub>calcd</sub> (g/cm <sup>3</sup> )                                    | 1.052                                                                              | 1.364                                                            |
| Absorption coefficient, mm <sup>−1</sup>                                          | 1.366                                                                              | 0.675                                                            |
| <i>F</i> (000)                                                                    | 1273                                                                               | 1704                                                             |
| Crystal size, mm                                                                  | 0.20 x 0.16 x 0.12                                                                 | 0.23 x 0.21 x 0.19                                               |
| $\theta$ range, deg                                                               | 4.496–52.042                                                                       | 4.962–61.17                                                      |
| Index range <i>h</i> , <i>k</i> , <i>l</i>                                        | −15/15, −22/22, −24/24                                                             | −23/23, −21/21, −23/23                                           |
| Reflections collected                                                             | 61585                                                                              | 59753                                                            |
| Independent reflections ( <i>R</i> <sub>int</sub> )                               | 10763 (0.0370)                                                                     | 11817(0.0735)                                                    |
| Data/restraint/parameters                                                         | 16074 / 280 / 813                                                                  | 11817 / 0 / 520                                                  |
| Goodness-of-fit on <i>F</i> <sup>2</sup>                                          | 1.117                                                                              | 1.060                                                            |
| Final <i>R</i> <sub>1</sub> , <i>wR</i> <sub>2</sub> ( <i>I</i> > 2σ( <i>I</i> )) | 0.0424, 0.1056                                                                     | 0.0709, 0.1100                                                   |
| Largest diff. peak and hole                                                       | 0.61, −0.58                                                                        | 0.44, −0.36                                                      |

**Table S2** Selected Bond Lengths [Å] and Angles [°] for the **1–2**

| Parameter   | Value      | Parameter   | Value      |
|-------------|------------|-------------|------------|
| <b>1</b>    |            |             |            |
| Zn1–O2      | 1.965(2)   | Zn1–O11     | 1.905(2)   |
| Zn1–O6      | 1.928(2)   | Zn1–N1      | 1.995(2)   |
| Zn2–O1      | 2.261(2)   | Zn2–O11     | 2.149(3)   |
| Zn2–O5      | 2.072(2)   | Zn2–N6E     | 2.600(3)   |
| Zn2–O9      | 2.026(2)   | Zn3–O3A     | 2.017(2)   |
| Zn3–O4B     | 2.068(2)   | Zn3–O7C     | 2.052(2)   |
| Zn3–O8D     | 2.055(2)   | Zn3–N4      | 2.021(2)   |
| O2–Zn1–O6   | 105.38(10) | O2–Zn1–N1   | 113.28(9)  |
| O6–Zn1–N1   | 102.58(9)  | O11–Zn1–O2  | 110.19(10) |
| O11–Zn1–O6  | 107.52(9)  | O11–Zn1–N1  | 116.8(9)   |
| O9–Zn2–O1   | 86.21(9)   | O9–Zn2–O5   | 93.35(8)   |
| O9–Zn2–N6E  | 88.54(10)  | O11–Zn2–O1  | 90.61(8)   |
| O11–Zn2–O5  | 102.21(8)  | O11–Zn2–O9  | 161.91(9)  |
| O11–Zn2–N6E | 94.87(10)  | N6E–Zn2–O1  | 174.52(9)  |
| O3A–Zn3–O4B | 156.24(11) | O3A–Zn3–O7C | 88.97(13)  |
| O3A–Zn3–O8D | 88.08(13)  | O3A–Zn3–N4  | 106.90(11) |
| O7C–Zn3–O4B | 87.75(12)  | O7C–Zn3–O8D | 156.74(9)  |
| O8D–Zn3–O4B | 85.73(11)  | N4–Zn3–O4B  | 96.82(10)  |
| N4–Zn3–O7C  | 101.06(9)  | N4–Zn3–O8D  | 101.88(10) |
| <b>2</b>    |            |             |            |
| Zn1–O1      | 1.965(2)   | Zn1–N1      | 2.057(2)   |
| Zn1–O4A     | 1.983(2)   | Zn1–N4B     | 2.074(2)   |
| O1–Zn1–O4A  | 125.53(8)  | O4A–Zn1–N1  | 109.81(8)  |
| O1–Zn1–N1   | 106.68(8)  | O4A–Zn1–N4B | 102.24(8)  |
| O1–Zn1–N4B  | 110.19(8)  | N4B–Zn1–N1  | 99.31(8)   |

symmetry code: A:  $-1+x, y, z$ , B:  $1-x, 2-y, 2-z$ , C:  $-1+x, 1+y, z$ , D:  $1-x, 1-y, 2-z$ , E:  $1-x, 1-y, 1-z$  for **1**. A:  $x, 0.5-y, 0.5+z$ , B:  $x, 1.5-y, -0.5+z$  for **2**

**Table S3** Thermal stability analysis for **1–2**

| MOF      | Loss of matter                            | Decomposition temperature/°C | Experimental value/% | Theoretical value/% |
|----------|-------------------------------------------|------------------------------|----------------------|---------------------|
| <b>1</b> | H <sub>2</sub> O/NDC <sup>2-</sup> and L1 | 26~126/320~550               | 1.81/78.60           | 1.84/78.74          |
| <b>2</b> | H <sub>2</sub> O/NDC <sup>2-</sup> and L2 | 34~100/310~530               | 4.41/85.62           | 3.90/85.88          |

**Table S4.** Comparison of the sensitivities of **1–2** with previously reported MOFs to enrofloxacin

| MOF                                                        | Types        | LOD/mol/L              | Ref       |
|------------------------------------------------------------|--------------|------------------------|-----------|
| [Cd(H <sub>2</sub> L)(H <sub>2</sub> O) <sub>3</sub> ]·NMP | enrofloxacin | $2.50 \times 10^{-8}$  | [11]      |
| Eu(2,6-NDC)(COO)                                           | enrofloxacin | $0.12 \times 10^{-6}$  | [14]      |
| <b>1</b>                                                   | enrofloxacin | $7.06 \times 10^{-10}$ | This work |
| <b>2</b>                                                   | enrofloxacin | $2.89 \times 10^{-9}$  | This work |

H<sub>4</sub>L = [1,1':4',1''-terphenyl]- 2',3,3'',5'-tetracarboxylic acid; 2,6-NDC = 2,6-naphthalenedicarboxylic acid.

**Table S5.** Comparison of the sensitivities of **1–2** with previously reported MOFs to  $\text{MnO}_4^-$ 

| MOF                                                                              | Types            | LOD/mol/L              | Ref       |
|----------------------------------------------------------------------------------|------------------|------------------------|-----------|
| $[\text{Zn}(5\text{-NH}_2\text{-1,3-bdc})(\text{H}_2\text{O})]$                  | $\text{MnO}_4^-$ | $1.280 \times 10^{-6}$ | [4]       |
| $[\text{Zn}_2(5\text{-NH}_2\text{-1,3-bdc})_2(\text{NI-bpy-44})]\cdot\text{DMF}$ | $\text{MnO}_4^-$ | $1.050 \times 10^{-6}$ | [4]       |
| $[\text{Zn}_2(\text{BDC})_{1.5}(\text{L})(\text{DMF})]\cdot 1.5\text{DMF}$       | $\text{MnO}_4^-$ | $0.030 \times 10^{-6}$ | [5]       |
| $(\text{Eu}_{0.06}\text{Tb}_{0.04}\text{Gd}_{0.9}\text{-DPNC})_n$                | $\text{MnO}_4^-$ | $0.020 \times 10^{-6}$ | [6]       |
| $\{[\text{Zn}_6\text{Cl}_6(2,2'\text{-dbpt})_3]\cdot 6\text{H}_2\text{O}\}_n$    | $\text{MnO}_4^-$ | $6.140 \times 10^{-6}$ | [8]       |
| <b>1</b>                                                                         | $\text{MnO}_4^-$ | $0.286 \times 10^{-6}$ | This work |
| <b>2</b>                                                                         | $\text{MnO}_4^-$ | $0.507 \times 10^{-6}$ | This work |

5-NH<sub>2</sub>-1,3-H<sub>2</sub>bdc = 5-amino-1,3-benzenedicarboxylic acid, NI-bpy-44 = N-(pyridin-4-yl)-4-(pyridin-4-yl)-1,8-naphthalimide; L = pyridine 4-carboxylic acid, BDC = benzene-1,4-dicarboxylate; H<sub>3</sub>DPNC = 5-(3',5'-dicarboxylphenyl) nicotinic acid; 2,2'-H<sub>2</sub>dpbt = 5,5'-di(pyridin-2-yl)-3,3'-bi(1,2,4-triazole).

**Table S6** The structural properties for **1** and **2**

| property                                    | <b>1</b> | <b>2</b> |
|---------------------------------------------|----------|----------|
| accessible surface area, m <sup>2</sup> /g  | 6535.03  | 11491.01 |
| geometric pore volume, cm <sup>3</sup> /g   | 1.67     | 3.43     |
| probe-occupiable volume, cm <sup>3</sup> /g | 1.60     | 3.37     |
| helium pore volume, cm <sup>3</sup> /g      | 1.37     | 3.00     |
| pore limiting diameter, Å                   | 6.06     | 7.45     |
| largest cavity diameter, Å                  | 8.64     | 9.74     |

### Section 3. Supplementary Figures

**Fig. S1.** (a) Coordination geometry of  $\text{Zn}^{2+}$  ions in **1**; (b) View of the coordination modes of  $\text{NDC}^{2-}$  anions in **1** (c) The three-dimensional structure formation process for **1**.

**Fig. S2.** (a) Coordination geometry of  $\text{Zn}^{2+}$  ions in **2**; (b) The two-dimensional structure formation process for **2**; (c) In **2**, the simplification of  $\text{NDC}^{2-}$  and L2 ligand and the specific formation process of **sql** topological structure.

**Fig. S3.** (a) Simulated and experimental PXRD patterns of **1–2**; (b) PXRD patterns of **1** and **2** under different conditions.

**Fig. S4.** The change of the fluorescence emission intensities of **1–2** in different pH solutions.

**Fig. S5.** TGA curves of **1–2**.

**Fig. S6** Time resolved luminescence decay of **1** and **2**.

**Fig. S7.** The plot of relative **1–2** luminescence intensities vs enrofloxacin (ENR) concentration.

**Fig. S8.** Time-dependent emission spectra of **1–2** with ENR ( $0.25 \mu\text{mol/L}$ ) at the different reaction time.

**Fig. S9.** The correlation curves between  $[(I_0/I) - 1]$  and the concentration of  $\text{MnO}_4^-$  obtained by the Stern–Volmer equation.

**Fig. S10.** The time required for the quenching efficiencies of **1/2**@ $\text{MnO}_4^-$  anions to reach the maximum.

**Fig. S11.** Comparison of the quenching efficiencies of **1–2** for sensing of ENR/ $\text{MnO}_4^-$  anions over four cycles.

**Fig. S12.** PXRD patterns of **1–2** after 4 cycles of detecting of ENR/ $\text{MnO}_4^-$  anions

**Fig. S13.** Fluorescence excitation spectra of **1/2** and UV–vis absorption spectrum of enrofloxacin.

**Fig. S14.** Spectral overlap between the absorption spectrum of  $\text{MnO}_4^-$  anions and the excitation spectra of **1–2**.

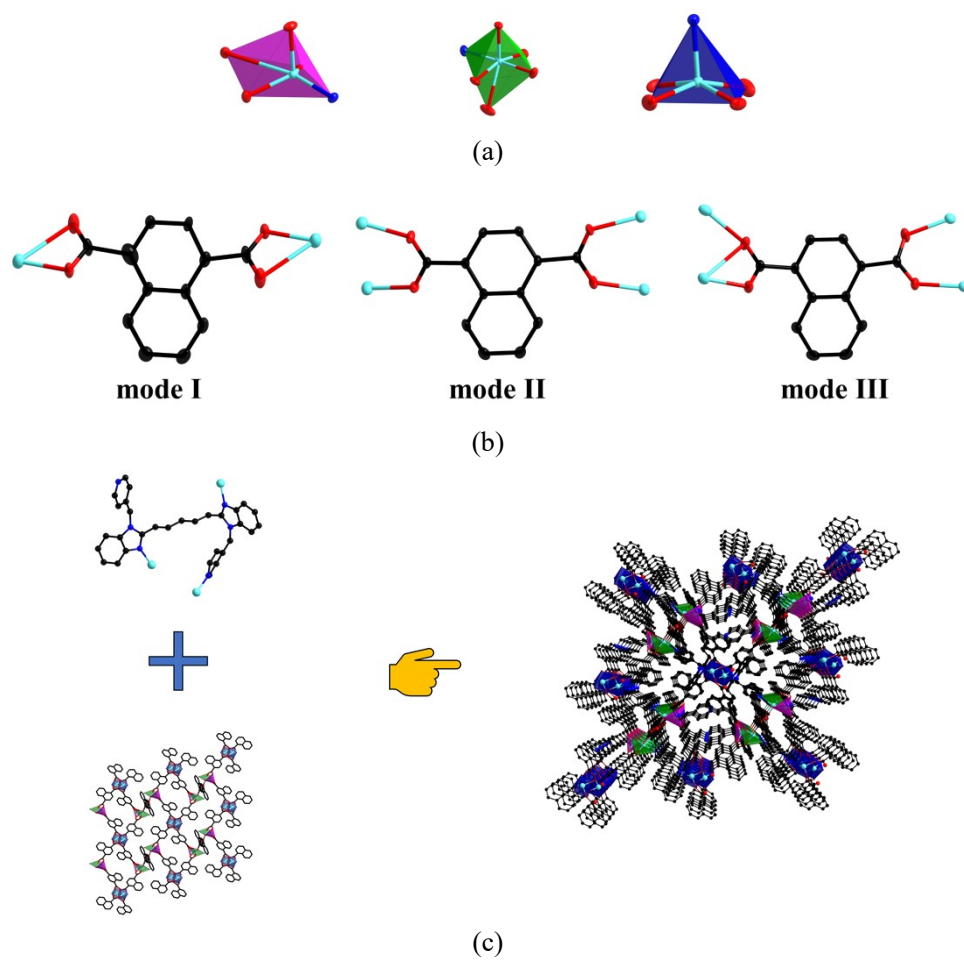

**Fig. S1.** (a) Coordination geometry of  $\text{Zn}^{2+}$  ions in **1**; (b) View of the coordination modes of  $\text{NDC}^{2-}$  anions in **1** (c) The three-dimensional structure formation process for **1**.



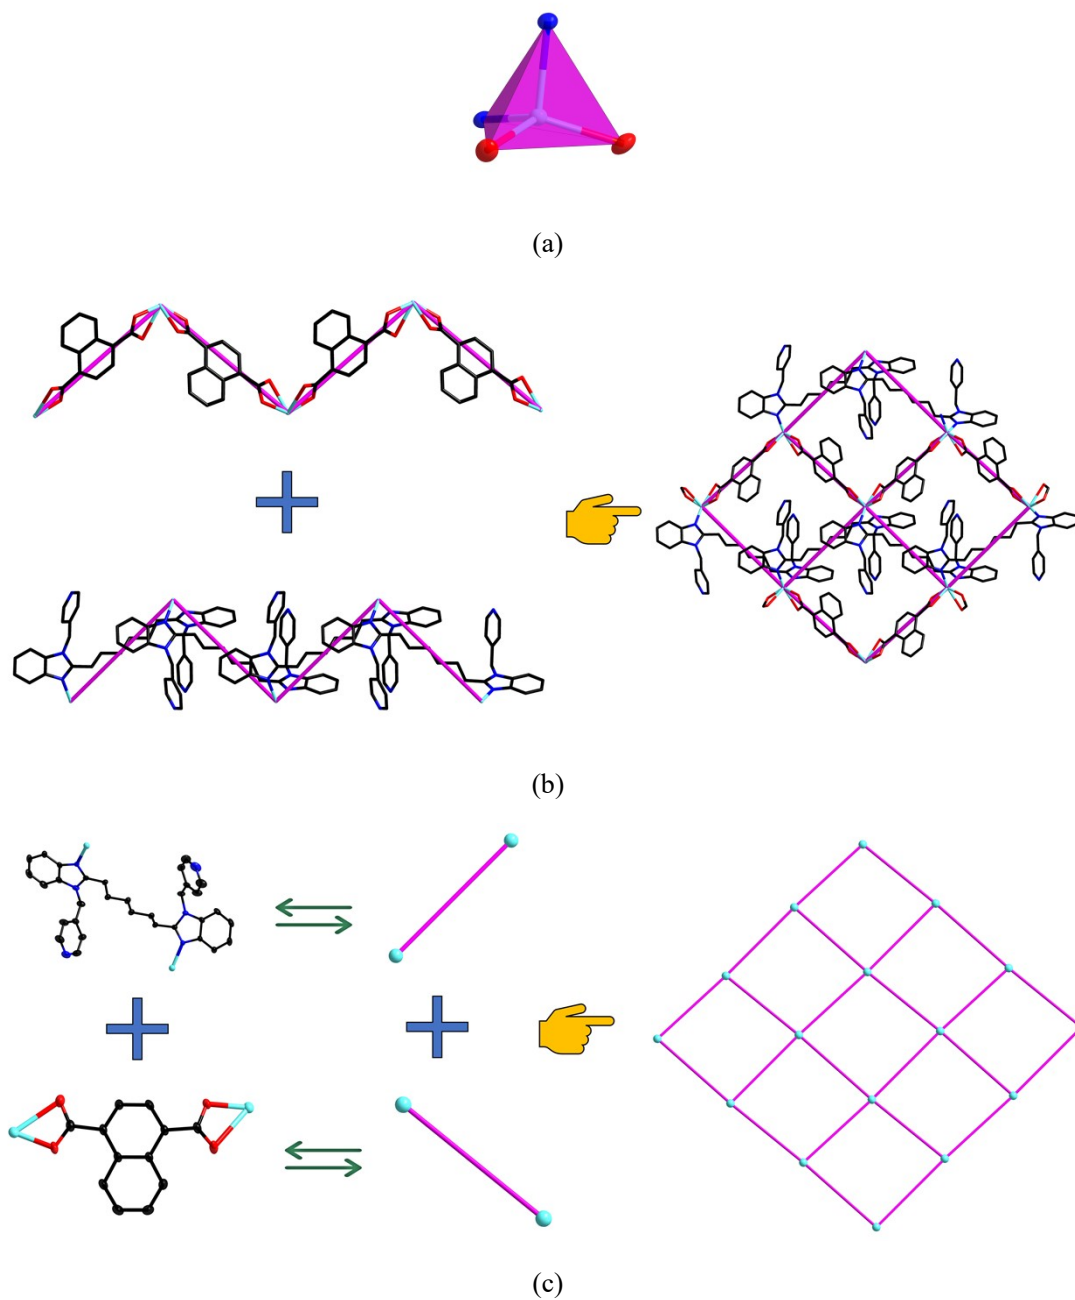

**Fig. S2.** (a) Coordination geometry of  $\text{Zn}^{2+}$  ions in **2**; (b) The two-dimensional structure formation process for **2**; (c) In **2**, the simplification of  $\text{NDC}^{2-}$  and L2 ligand and the specific formation process of **sql** topological structure.

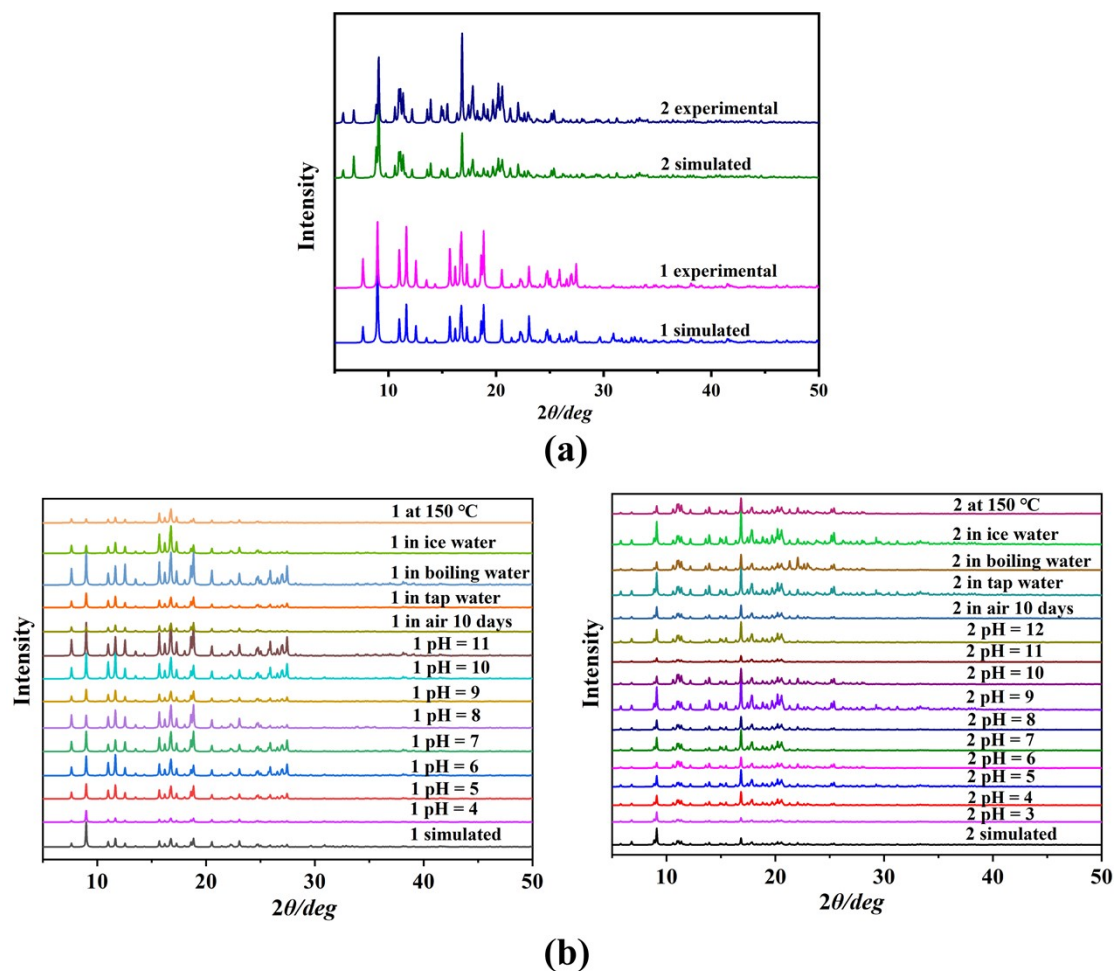

**Fig. S3.** (a) Simulated and experimental PXRD patterns of 1–2; (b) PXRD patterns of 1 and 2 under different conditions.

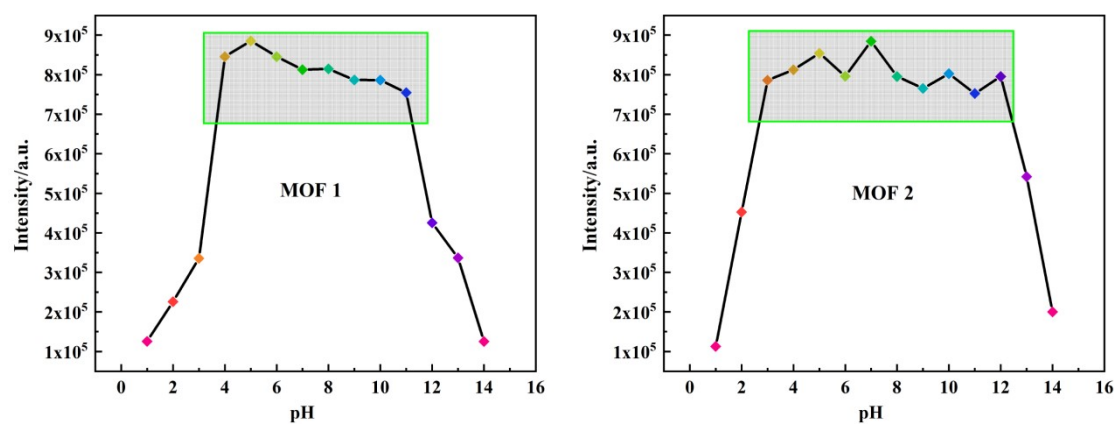

**Fig. S4.** The change of the fluorescence emission intensities of **1–2** in different pH solutions.

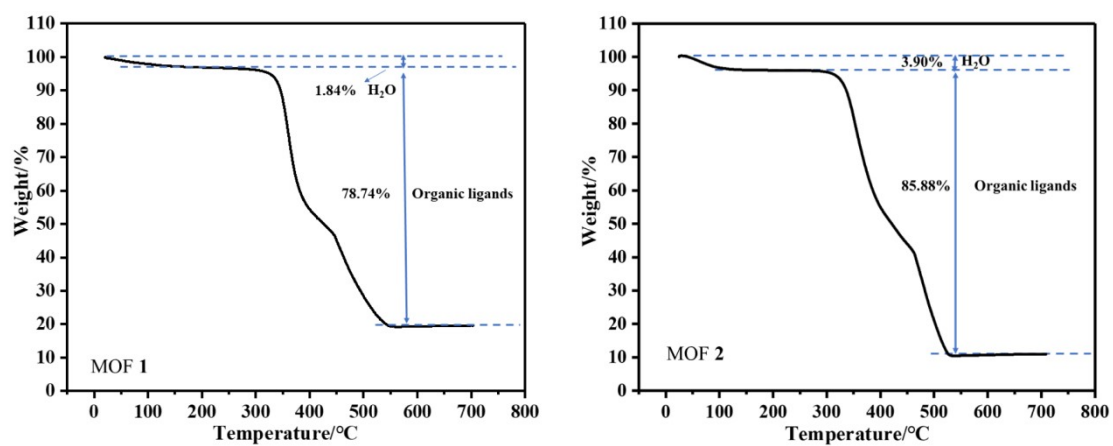

Fig. S5. TGA curves of 1–2.

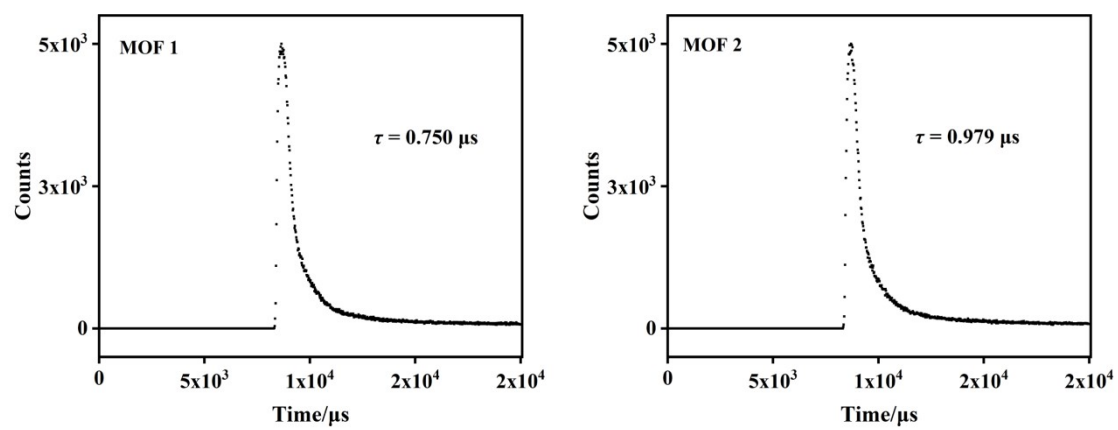

**Fig. S6** Time resolved luminescence decay of **1** and **2**.

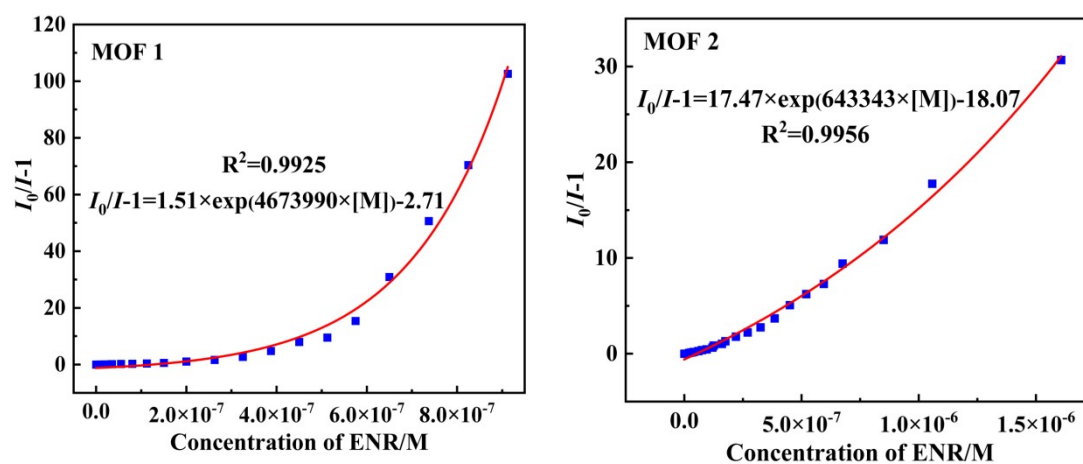

**Fig. S7.** The plots of relative 1–2 luminescence intensities vs enrofloxacin (ENR) concentration.

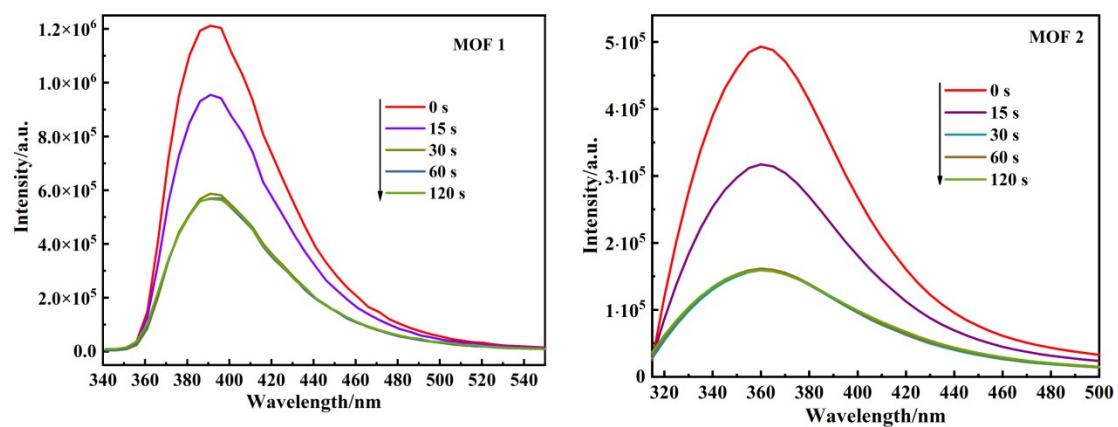

**Fig. S8.** Time-dependent emission spectra of **1–2** with ENR (0.25  $\mu\text{mol/L}$ ) at the different reaction time.

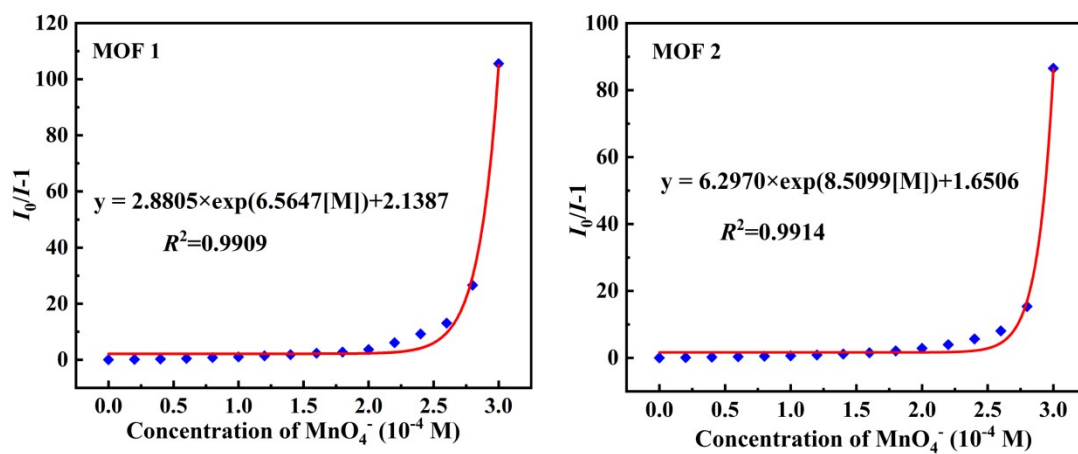

**Fig. S9.** The correlation curves between  $[(I_0/I) - 1]$  and the concentration of  $\text{MnO}_4^-$  obtained by the Stern–Volmer equation.



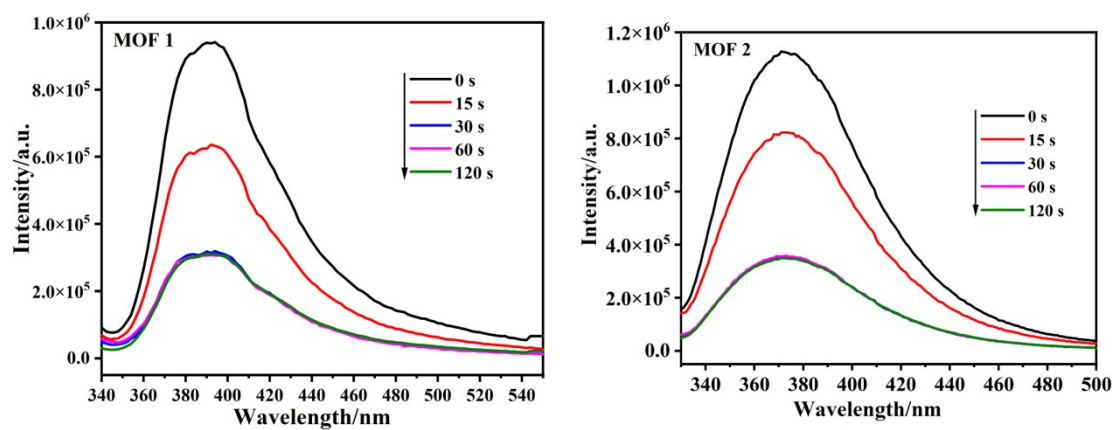

**Fig. S10.** The time required for the quenching efficiencies of  $1/2@MnO_4^-$  anions to reach the maximum.

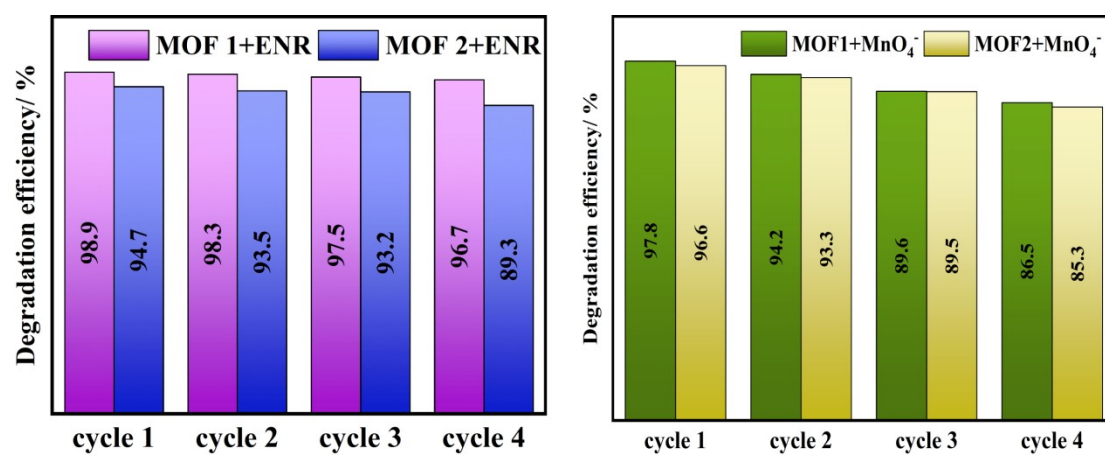

**Fig. S11.** Comparison of the quenching efficiencies of **1–2** for sensing of ENR/MnO<sub>4</sub><sup>-</sup> anions over four cycles.

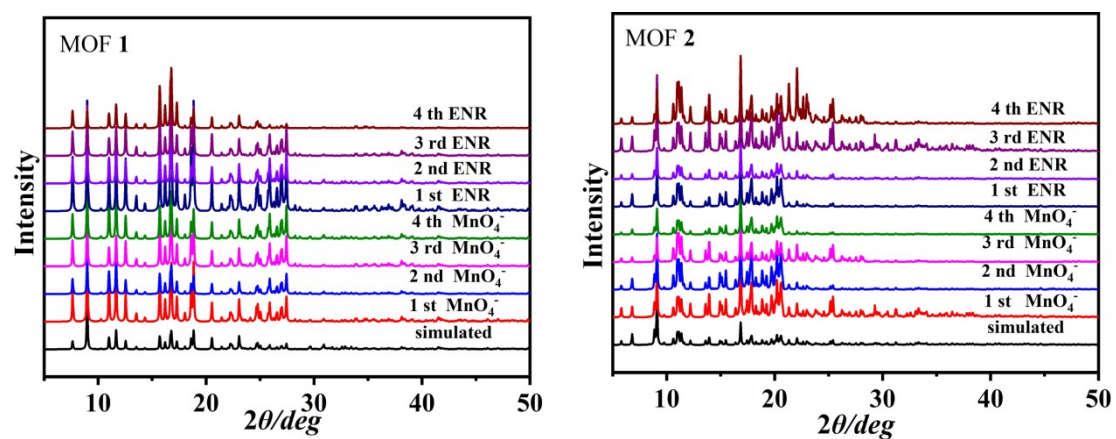

Fig. S12. PXRD patterns of 1–2 after 4 cycles of detecting of ENR/ $\text{MnO}_4^-$  anions

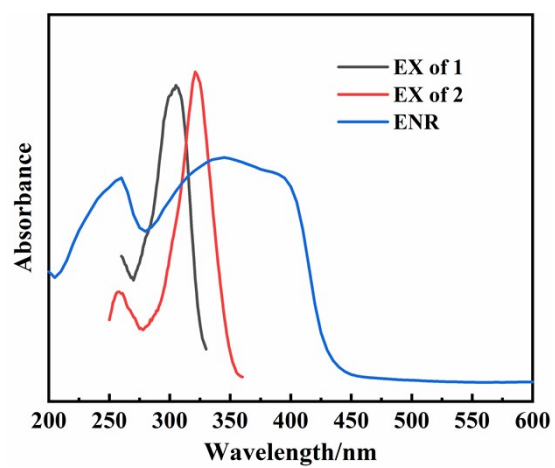

**Fig. S13.** Fluorescence excitation spectra of **1/2** and UV-vis absorption spectrum of enrofloxacin.

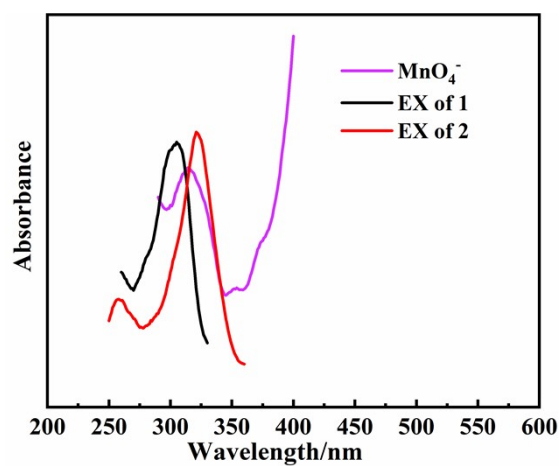

**Fig. S14.** Spectral overlap between the absorption spectrum of  $\text{MnO}_4^-$  anions and the excitation spectra of **1–2**.
